# Supplementary material
Source: PubMed Central journal article supplement (PMC6180055)
Supplement: 41418_2018_143_MOESM2_ESM.pdf [file 41418_2018_143_MOESM2_ESM.pdf]

# DECLARATION OF CONTRIBUTIONS TO ARTICLE

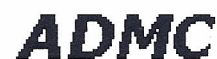

Manuscript Number:

**CDD-18-0370**

Journal Name:

*Cell Death & Differentiation*

(the 'Journal')

Proposed Title of the Contribution:

**Strong and Sustained Activation of the Anticipatory Unfolded Protein Response Induces Necrotic Cell Death**

(the 'Contribution')

Author(s):

**Mara Livezey, Rui Huang, Paul J. Hergenrother, and David J. Shapiro**

(the 'Authors')

For all *CDD* articles, each person named as an author in the published version must be able to show he or she has contributed substantially to the article.

Authorship credit should be based on 1) substantial contributions to conception and design, acquisition of data, or analysis and interpretation of data; 2) drafting the article or revising it critically for important intellectual content; and 3) final approval of the version to be published. Authors should meet conditions 1, 2 and 3.

Any person who cannot be shown to have made a substantial contribution to the article cannot be listed as an author in the final version. The name of any person who is deemed to have made a minor contribution can, however, appear in the Acknowledgments section of the article.

Please complete the table below to indicate the contributions of all named authors to the manuscript.

| Author Full Name:    | Specification of Contribution to the Manuscript:                                                                                                                     |
|----------------------|----------------------------------------------------------------------------------------------------------------------------------------------------------------------|
| Mara Livezey         | Contributions to conception, design, acquisition, analysis, and interpretation of data, drafting of article and revision, final approval of version to be published. |
| Rui Huang            | Contributions to acquisition, analysis, and interpretation of data, revision of article, final approval of version to be published.                                  |
| Paul J. Hergenrother | Provided materials, contribution to conception of work, revision of article, final approval of version to be published.                                              |
| David J. Shapiro     | Contribution to conception and design of work, interpretation of data, drafting and revision of article, final approval of version to be published.                  |
|                      |                                                                                                                                                                      |
|                      |                                                                                                                                                                      |
|                      |                                                                                                                                                                      |
|                      |                                                                                                                                                                      |
|                      |                                                                                                                                                                      |
|                      |                                                                                                                                                                      |
|                      |                                                                                                                                                                      |
|                      |                                                                                                                                                                      |
|                      |                                                                                                                                                                      |

Please complete the table below to indicate the contributions of all named authors to the figures.

Figure 1:

Acquisition, analysis, and interpretation of data: (a-b) ML (c-d) ML and RH (e) RH. Figure prepared and assembled by ML.

Figure 2:

Acquisition, analysis, and interpretation of data: (a) ML and RH (b-d) ML (e) ML and RH. Figure prepared and assembled by ML.

Figure 3:

Acquisition, analysis, and interpretation of data: (a-b) ML and RH(c) ML. Figure prepared by ML and RH and assembled by ML.

Figure 4:

Acquisition, analysis, and interpretation of data: (a-b) ML and RH (c-f) ML. Figure prepared and assembled by ML.

Figure 5:

Acquisition, analysis, and interpretation of data: (a-c) ML (d) ML and RH (e-f) ML. Figure prepared and assembled by ML.

Figure 6:

Acquisition, analysis, and interpretation of data: (a-b) ML. Figure prepared and assembled by ML. Figure 7. (a) ML (b) RH (c) ML (d-e) ML and RH. Figure prepared by ML, panel (e) by RH, and assembled by ML.

Signed for and on behalf of the Author(s):

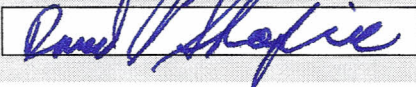

Print Name:

David J. Shapiro

Date:

5/18/2018
